# Supplementary material
Source: publisher site journal article supplement (https://www.spandidos-publications.com/7470/downloadSupplementary)
Supplement: Supplementary file 1 [file downloadSupplementary]

## Sheet: GO
Table SXI. The results of gene ontology enrichment analysis for 467 differentially expressed genes between the low- and high-expression groups of DEPP1.
	ONTOLOGY	ID	Description	GeneRatio	BgRatio	pvalue	p.adjust	qvalue	geneID	Count
GO:0044241	BP	GO:0044241	lipid digestion	10/417	21/18723	7.64722e-12	2.66659e-08	2.2515e-08	336/339221/335/8435/337/116519/1056/5408/5406/3952	10
GO:0019730	BP	GO:0019730	antimicrobial humoral response	19/417	122/18723	2.69776e-11	4.70354e-08	3.97138e-08	566/1991/7018/2147/25818/114771/3605/1671/149708/2244/84659/26525/1673/3853/1670/5319/130120/354/5968	19
GO:0030299	BP	GO:0030299	intestinal cholesterol absorption	9/417	18/18723	5.03892e-11	5.8569e-08	4.94521e-08	336/339221/335/8435/337/116519/1056/5406/3952	9
GO:0007586	BP	GO:0007586	digestion	19/417	137/18723	2.13164e-10	1.85826e-07	1.569e-07	336/56287/339221/335/8435/3605/337/116519/5222/1208/114131/1056/5408/5644/5406/4760/3952/887/4583	19
GO:0098856	BP	GO:0098856	intestinal lipid absorption	9/417	21/18723	2.8707e-10	2.00203e-07	1.69039e-07	336/339221/335/8435/337/116519/1056/5406/3952	9
GO:0034368	BP	GO:0034368	protein-lipid complex remodeling	10/417	30/18723	5.44426e-10	2.71202e-07	2.28986e-07	336/4353/4547/345/335/338/337/50487/116519/183	10
GO:0034369	BP	GO:0034369	plasma lipoprotein particle remodeling	10/417	30/18723	5.44426e-10	2.71202e-07	2.28986e-07	336/4353/4547/345/335/338/337/50487/116519/183	10
GO:0071825	BP	GO:0071825	protein-lipid complex subunit organization	12/417	50/18723	7.1928e-10	3.13516e-07	2.64714e-07	336/4353/4547/345/335/8435/338/337/50487/116519/183/6456	12
GO:0034367	BP	GO:0034367	protein-containing complex remodeling	10/417	32/18723	1.12333e-09	4.35228e-07	3.6748e-07	336/4353/4547/345/335/338/337/50487/116519/183	10
GO:0061844	BP	GO:0061844	antimicrobial humoral immune response mediated by antimicrobial peptide	14/417	79/18723	1.98333e-09	6.91588e-07	5.83935e-07	1991/2147/25818/114771/3605/1671/84659/1673/3853/1670/5319/130120/354/5968	14
GO:0071827	BP	GO:0071827	plasma lipoprotein particle organization	11/417	46/18723	3.88327e-09	1.22254e-06	1.03224e-06	336/4353/4547/345/335/8435/338/337/50487/116519/183	11
GO:0023061	BP	GO:0023061	signal release	33/417	463/18723	4.51928e-09	1.22254e-06	1.03224e-06	6532/50487/7021/2244/2266/6447/6860/63036/114131/4826/5798/107/2641/4760/116/9379/1113/6855/183/3952/1141/6616/3623/6833/9699/6861/222546/2922/7476/1081/9370/7432/9607	33
GO:0008544	BP	GO:0008544	epidermis development	27/417	324/18723	4.5578e-09	1.22254e-06	1.03224e-06	25928/3866/7051/84518/3857/7053/8626/25818/79755/1475/8456/9333/5948/51806/3852/204219/6703/6705/388533/3861/3713/6707/6698/6704/130120/8643/4804	27
GO:0097006	BP	GO:0097006	regulation of plasma lipoprotein particle levels	14/417	85/18723	5.36396e-09	1.28889e-06	1.08826e-06	336/4353/4547/345/335/8435/338/337/50487/116519/338328/183/6833/9370	14
GO:0015850	BP	GO:0015850	organic hydroxy compound transport	25/417	284/18723	5.70815e-09	1.28889e-06	1.08826e-06	336/6532/4547/339221/345/1581/335/8435/338/337/116519/6860/1056/6571/5406/1113/6570/183/3952/1141/6861/359/9370/7432/9607	25
GO:0009914	BP	GO:0009914	hormone transport	26/417	306/18723	5.91403e-09	1.28889e-06	1.08826e-06	50487/7021/2244/7276/2266/6447/63036/114131/4826/5798/2641/4760/116/1113/183/3952/6616/3623/6833/9699/222546/2922/1081/9370/7432/9607	26
GO:0046879	BP	GO:0046879	hormone secretion	25/417	295/18723	1.22912e-08	2.52114e-06	2.1287e-06	50487/7021/2244/2266/6447/63036/114131/4826/5798/2641/4760/116/1113/183/3952/6616/3623/6833/9699/222546/2922/1081/9370/7432/9607	25
GO:0065005	BP	GO:0065005	protein-lipid complex assembly	9/417	31/18723	1.61585e-08	3.13026e-06	2.643e-06	336/4547/345/335/8435/338/337/116519/6456	9
GO:0030300	BP	GO:0030300	regulation of intestinal cholesterol absorption	6/417	10/18723	2.29324e-08	4.2087e-06	3.55357e-06	336/339221/335/337/116519/3952	6
GO:0030902	BP	GO:0030902	hindbrain development	17/417	151/18723	4.68936e-08	7.59813e-06	6.4154e-06	9001/6532/3975/653/2637/124925/429/4761/4009/4760/5457/1272/8941/869/7476/401/4808	17
GO:0061365	BP	GO:0061365	positive regulation of triglyceride lipase activity	6/417	11/18723	4.9503e-08	7.59813e-06	6.4154e-06	335/337/116519/350/5406/338328	6
GO:1904729	BP	GO:1904729	regulation of intestinal lipid absorption	6/417	11/18723	4.9503e-08	7.59813e-06	6.4154e-06	336/339221/335/337/116519/3952	6
GO:0031424	BP	GO:0031424	keratinization	11/417	58/18723	5.21314e-08	7.59813e-06	6.4154e-06	7051/84518/7053/25818/204219/6703/6705/3713/6707/6698/6704	11
GO:0018149	BP	GO:0018149	peptide cross-linking	9/417	35/18723	5.22957e-08	7.59813e-06	6.4154e-06	7047/7051/7053/1475/9333/3713/6707/6698/6704	9
GO:0034377	BP	GO:0034377	plasma lipoprotein particle assembly	8/417	27/18723	8.67348e-08	1.20978e-05	1.02146e-05	336/4547/345/335/8435/338/337/116519	8
GO:1904478	BP	GO:1904478	regulation of intestinal absorption	6/417	13/18723	1.77025e-07	2.37418e-05	2.00462e-05	336/339221/335/337/116519/3952	6
GO:0046883	BP	GO:0046883	regulation of hormone secretion	21/417	249/18723	1.98757e-07	2.56691e-05	2.16734e-05	50487/7021/2244/2266/6447/63036/114131/4826/2641/4760/116/1113/183/3952/6616/3623/6833/222546/2922/9370/9607	21
GO:0050892	BP	GO:0050892	intestinal absorption	9/417	41/18723	2.30523e-07	2.87083e-05	2.42396e-05	336/339221/335/8435/337/116519/1056/5406/3952	9
GO:0031640	BP	GO:0031640	killing of cells of other organism	11/417	68/18723	2.8743e-07	3.4561e-05	2.91812e-05	566/1991/2147/114771/6338/1671/1673/3853/1670/130120/1113	11
GO:0030216	BP	GO:0030216	keratinocyte differentiation	15/417	139/18723	5.05268e-07	5.8729e-05	4.95872e-05	7051/84518/7053/8626/25818/1475/8456/204219/6703/6705/3713/6707/6698/6704/130120	15
GO:0022600	BP	GO:0022600	digestive system process	13/417	104/18723	5.3708e-07	5.93727e-05	5.01307e-05	336/339221/335/8435/3605/337/116519/1056/5406/4760/3952/887/4583	13
GO:0009306	BP	GO:0009306	protein secretion	25/417	359/18723	5.4486e-07	5.93727e-05	5.01307e-05	4547/7021/2244/6288/2266/5319/63036/114131/4826/5798/2641/4760/116/1113/27063/3952/7857/6616/9515/6833/9699/222546/869/7432/9607	25
GO:0035592	BP	GO:0035592	establishment of protein localization to extracellular region	25/417	360/18723	5.73676e-07	6.06185e-05	5.11825e-05	4547/7021/2244/6288/2266/5319/63036/114131/4826/5798/2641/4760/116/1113/27063/3952/7857/6616/9515/6833/9699/222546/869/7432/9607	25
GO:0019731	BP	GO:0019731	antibacterial humoral response	10/417	60/18723	7.52452e-07	7.71706e-05	6.51581e-05	1991/7018/25818/1671/149708/2244/84659/1670/5319/354	10
GO:0034374	BP	GO:0034374	low-density lipoprotein particle remodeling	6/417	16/18723	7.80473e-07	7.77574e-05	6.56536e-05	336/4353/4547/338/50487/183	6
GO:0022037	BP	GO:0022037	metencephalon development	13/417	108/18723	8.34182e-07	8.07998e-05	6.82225e-05	9001/3975/2637/124925/429/4761/4009/4760/1272/8941/869/7476/401	13
GO:0071692	BP	GO:0071692	protein localization to extracellular region	25/417	368/18723	8.60071e-07	8.10559e-05	6.84386e-05	4547/7021/2244/6288/2266/5319/63036/114131/4826/5798/2641/4760/116/1113/27063/3952/7857/6616/9515/6833/9699/222546/869/7432/9607	25
GO:0050832	BP	GO:0050832	defense response to fungus	9/417	49/18723	1.15471e-06	0.000105715	8.9259e-05	4353/1991/3605/1671/84659/26525/387695/1670/1113	9
GO:0042886	BP	GO:0042886	amide transport	22/417	301/18723	1.18236e-06	0.000105715	8.9259e-05	4547/7380/4036/7021/2244/2266/63036/114131/4826/5798/2641/4760/116/1113/3952/6616/6833/9699/222546/2922/7432/9607	22
GO:0051006	BP	GO:0051006	positive regulation of lipoprotein lipase activity	5/417	10/18723	1.22977e-06	0.000107205	9.05174e-05	335/337/116519/350/338328	5
GO:0030072	BP	GO:0030072	peptide hormone secretion	19/417	236/18723	1.53101e-06	0.000130211	0.000109942	7021/2244/2266/63036/114131/4826/5798/2641/4760/116/1113/3952/6616/6833/9699/222546/2922/7432/9607	19
GO:0034433	BP	GO:0034433	steroid esterification	6/417	18/18723	1.74206e-06	0.000138059	0.000116568	336/335/8435/337/116519/183	6
GO:0034434	BP	GO:0034434	sterol esterification	6/417	18/18723	1.74206e-06	0.000138059	0.000116568	336/335/8435/337/116519/183	6
GO:0034435	BP	GO:0034435	cholesterol esterification	6/417	18/18723	1.74206e-06	0.000138059	0.000116568	336/335/8435/337/116519/183	6
GO:0043588	BP	GO:0043588	skin development	20/417	263/18723	1.97518e-06	0.000151926	0.000128277	25928/7051/84518/3857/7053/8626/25818/1475/8456/7021/204219/6703/6705/3713/6707/6698/6704/130120/8643/4804	20
GO:0042445	BP	GO:0042445	hormone metabolic process	18/417	218/18723	2.01231e-06	0.000151926	0.000128277	174/6822/653/6338/3283/10720/6121/131/7276/6447/5122/5406/2834/1551/3952/124/5126/1081	18
GO:0015837	BP	GO:0015837	amine transport	12/417	99/18723	2.04775e-06	0.000151926	0.000128277	51458/6860/6571/10991/1113/6570/183/3952/1141/6861/7432/9607	12
GO:0002790	BP	GO:0002790	peptide secretion	19/417	242/18723	2.22499e-06	0.000161636	0.000136476	7021/2244/2266/63036/114131/4826/5798/2641/4760/116/1113/3952/6616/6833/9699/222546/2922/7432/9607	19
GO:0050830	BP	GO:0050830	defense response to Gram-positive bacterium	12/417	101/18723	2.53707e-06	0.000180546	0.000152442	163351/114771/3605/1671/84659/1673/387695/3853/1670/5319/130120/1113	12
GO:0051873	BP	GO:0051873	killing by host of symbiont cells	7/417	29/18723	2.64106e-06	0.000180576	0.000152468	566/1991/2147/6338/3853/1670/130120	7
GO:0051883	BP	GO:0051883	killing of cells in other organism involved in symbiotic interaction	7/417	29/18723	2.64106e-06	0.000180576	0.000152468	566/1991/2147/6338/3853/1670/130120	7
GO:0006959	BP	GO:0006959	humoral immune response	22/417	317/18723	2.77604e-06	0.000186155	0.000157178	566/1991/7018/2147/25818/114771/3605/1671/149708/3543/2244/84659/26525/1673/731/3853/1670/5319/130120/730/354/5968	22
GO:0045940	BP	GO:0045940	positive regulation of steroid metabolic process	7/417	30/18723	3.37923e-06	0.000222328	0.00018772	336/1581/335/337/116519/183/1081	7
GO:0051004	BP	GO:0051004	regulation of lipoprotein lipase activity	6/417	20/18723	3.50225e-06	0.000226155	0.000190951	345/335/337/116519/350/338328	6
GO:0034370	BP	GO:0034370	triglyceride-rich lipoprotein particle remodeling	5/417	12/18723	3.72488e-06	0.00023194	0.000195836	336/345/335/337/116519	5
GO:0034372	BP	GO:0034372	very-low-density lipoprotein particle remodeling	5/417	12/18723	3.72488e-06	0.00023194	0.000195836	336/345/335/337/116519	5
GO:0042742	BP	GO:0042742	defense response to bacterium	23/417	350/18723	4.1286e-06	0.000252569	0.000213254	4353/566/1991/7018/2147/163351/25818/114771/6338/3605/1671/149708/3543/2244/84659/1673/387695/3853/1670/5319/130120/1113/354	23
GO:1903532	BP	GO:1903532	positive regulation of secretion by cell	20/417	282/18723	5.69624e-06	0.000342462	0.000289154	6532/50487/2244/2266/5319/6860/114131/4826/2641/116/27063/183/3952/1141/3623/8941/222546/2922/7432/9607	20
GO:0033700	BP	GO:0033700	phospholipid efflux	5/417	13/18723	5.94228e-06	0.000351199	0.000296531	336/345/335/337/116519	5
GO:0009620	BP	GO:0009620	response to fungus	9/417	60/18723	6.6927e-06	0.000388958	0.000328412	4353/1991/3605/1671/84659/26525/387695/1670/1113	9
GO:0015918	BP	GO:0015918	sterol transport	13/417	130/18723	6.80959e-06	0.000389263	0.00032867	336/4547/339221/345/335/8435/338/337/116519/1056/5406/3952/9370	13
GO:0003018	BP	GO:0003018	vascular process in circulatory system	19/417	263/18723	7.48515e-06	0.00042098	0.000355449	566/6532/6338/4036/2244/796/2266/387700/3764/388662/10991/6542/116/183/3952/147/155/6456/6833	19
GO:0015833	BP	GO:0015833	peptide transport	19/417	264/18723	7.90324e-06	0.000437438	0.000369346	7021/2244/2266/63036/114131/4826/5798/2641/4760/116/1113/3952/6616/6833/9699/222546/2922/7432/9607	19
GO:0090276	BP	GO:0090276	regulation of peptide hormone secretion	16/417	196/18723	8.59082e-06	0.000468065	0.000395206	7021/2244/2266/63036/114131/4826/2641/4760/116/1113/3952/6616/6833/222546/2922/9607	16
GO:0010872	BP	GO:0010872	regulation of cholesterol esterification	5/417	14/18723	9.07467e-06	0.000486821	0.000411042	336/335/337/116519/183	5
GO:0042632	BP	GO:0042632	cholesterol homeostasis	11/417	96/18723	9.4618e-06	0.000499898	0.000422084	336/4547/345/1581/335/8435/338/337/116519/338328/2167	11
GO:0055092	BP	GO:0055092	sterol homeostasis	11/417	97/18723	1.04618e-05	0.000539794	0.000455769	336/4547/345/1581/335/8435/338/337/116519/338328/2167	11
GO:0008202	BP	GO:0008202	steroid metabolic process	21/417	319/18723	1.05265e-05	0.000539794	0.000455769	336/174/6822/1581/9965/653/335/8435/6338/338/3283/337/10720/116519/4036/1056/866/1551/183/3952/1081	21
GO:0016042	BP	GO:0016042	lipid catabolic process	21/417	320/18723	1.10386e-05	0.000552368	0.000466386	336/6822/339221/345/1581/123745/335/338/337/116519/219970/1208/5319/1056/5408/5406/345557/5346/3952/9370/1149	21
GO:0002791	BP	GO:0002791	regulation of peptide secretion	16/417	200/18723	1.10885e-05	0.000552368	0.000466386	7021/2244/2266/63036/114131/4826/2641/4760/116/1113/3952/6616/6833/222546/2922/9607	16
GO:0030301	BP	GO:0030301	cholesterol transport	12/417	117/18723	1.18435e-05	0.000581667	0.000491124	336/339221/345/335/8435/338/337/116519/1056/5406/3952/9370	12
GO:0009913	BP	GO:0009913	epidermal cell differentiation	16/417	202/18723	1.2565e-05	0.000600194	0.000506767	7051/84518/7053/8626/25818/1475/8456/204219/6703/6705/3713/6707/6698/6704/130120/8643	16
GO:0090087	BP	GO:0090087	regulation of peptide transport	16/417	202/18723	1.2565e-05	0.000600194	0.000506767	7021/2244/2266/63036/114131/4826/2641/4760/116/1113/3952/6616/6833/222546/2922/9607	16
GO:0021549	BP	GO:0021549	cerebellum development	11/417	99/18723	1.27405e-05	0.000600352	0.000506901	9001/3975/2637/124925/4761/4009/4760/1272/8941/869/7476	11
GO:0019218	BP	GO:0019218	regulation of steroid metabolic process	11/417	100/18723	1.40333e-05	0.000652453	0.000550891	336/1581/9965/653/335/338/337/116519/183/3952/1081	11
GO:0021953	BP	GO:0021953	central nervous system neuron differentiation	14/417	162/18723	1.64649e-05	0.000755435	0.000637843	1746/1745/3975/2637/7101/429/1996/3952/5457/1141/869/7476/401/4808	14
GO:0015844	BP	GO:0015844	monoamine transport	10/417	84/18723	1.71324e-05	0.000775852	0.000655082	6532/6860/6571/1113/6570/183/1141/6861/7432/9607	10
GO:0034375	BP	GO:0034375	high-density lipoprotein particle remodeling	5/417	16/18723	1.9083e-05	0.000853107	0.000720312	336/345/335/337/50487	5
GO:0034381	BP	GO:0034381	plasma lipoprotein particle clearance	8/417	53/18723	2.08648e-05	0.000920958	0.000777601	336/345/335/8435/338/338328/6833/9370	8
GO:0046461	BP	GO:0046461	neutral lipid catabolic process	7/417	39/18723	2.14778e-05	0.000924607	0.000780681	336/345/335/338/337/116519/5408	7
GO:0046464	BP	GO:0046464	acylglycerol catabolic process	7/417	39/18723	2.14778e-05	0.000924607	0.000780681	336/345/335/338/337/116519/5408	7
GO:0051047	BP	GO:0051047	positive regulation of secretion	20/417	310/18723	2.2801e-05	0.000969599	0.000818671	6532/50487/2244/2266/5319/6860/114131/4826/2641/116/27063/183/3952/1141/3623/8941/222546/2922/7432/9607	20
GO:0032094	BP	GO:0032094	response to food	7/417	40/18723	2.55392e-05	0.00107295	0.000905936	4353/6338/2520/80763/1208/3952/9607	7
GO:0033555	BP	GO:0033555	multicellular organismal response to stress	9/417	71/18723	2.71703e-05	0.00112789	0.000952323	7101/27136/796/6869/4761/116/7060/644139/1620	9
GO:0045834	BP	GO:0045834	positive regulation of lipid metabolic process	13/417	149/18723	2.97239e-05	0.00121938	0.00102957	336/339221/1581/2147/335/337/50487/116519/183/6366/6363/1081/9370	13
GO:0055078	BP	GO:0055078	sodium ion homeostasis	8/417	56/18723	3.15475e-05	0.00127914	0.00108003	7380/6338/495/7021/496/80763/183/730	8
GO:0030073	BP	GO:0030073	insulin secretion	15/417	195/18723	3.29382e-05	0.00132018	0.00111468	7021/63036/114131/4826/5798/2641/4760/116/1113/3952/6616/6833/9699/222546/9607	15
GO:0050708	BP	GO:0050708	regulation of protein secretion	18/417	268/18723	3.44108e-05	0.0013607	0.00114889	7021/2244/6288/2266/5319/63036/114131/4826/2641/4760/1113/27063/3952/6616/9515/6833/222546/9607	18
GO:0060191	BP	GO:0060191	regulation of lipase activity	10/417	91/18723	3.47296e-05	0.0013607	0.00114889	336/345/335/337/116519/350/5319/5406/338328/183	10
GO:0019433	BP	GO:0019433	triglyceride catabolic process	6/417	29/18723	3.62161e-05	0.00140317	0.00118475	345/335/338/337/116519/5408	6
GO:0014014	BP	GO:0014014	negative regulation of gliogenesis	7/417	43/18723	4.16761e-05	0.00159697	0.00134839	1746/1745/2147/79727/7101/116/6833	7
GO:0072378	BP	GO:0072378	blood coagulation, fibrin clot formation	4/417	10/18723	4.57945e-05	0.00173571	0.00146553	462/2244/350/2266	4
GO:0044058	BP	GO:0044058	regulation of digestive system process	7/417	44/18723	4.86204e-05	0.00182301	0.00153923	336/339221/335/337/116519/4760/3952	7
GO:0006836	BP	GO:0006836	neurotransmitter transport	15/417	208/18723	6.91368e-05	0.00256468	0.00216546	6532/246213/6860/6571/107/9899/388662/9379/6570/6855/6616/9699/6861/7476/6572	15
GO:0034379	BP	GO:0034379	very-low-density lipoprotein particle assembly	4/417	11/18723	7.06981e-05	0.00256796	0.00216823	4547/345/8435/338	4
GO:0070944	BP	GO:0070944	neutrophil-mediated killing of bacterium	4/417	11/18723	7.06981e-05	0.00256796	0.00216823	566/1991/2147/6338	4
GO:0001523	BP	GO:0001523	retinoid metabolic process	9/417	81/18723	7.82533e-05	0.00281309	0.0023752	6017/6121/5948/4036/131/7276/5406/1551/124	9
GO:0048485	BP	GO:0048485	sympathetic nervous system development	5/417	21/18723	8.10907e-05	0.00288534	0.00243621	8626/7021/3642/429/401	5
GO:0010466	BP	GO:0010466	negative regulation of peptidase activity	17/417	262/18723	8.66046e-05	0.00305041	0.00257558	199713/197/462/327657/1475/144568/149708/84651/5275/866/221476/183/5276/51050/5104/3053/3697	17
GO:0006869	BP	GO:0006869	lipid transport	22/417	398/18723	9.27958e-05	0.00323579	0.0027321	336/4547/339221/345/1581/335/8435/338/337/50487/116519/350/80763/5319/1056/5406/183/3952/2167/5104/9370/343702	22
GO:0046503	BP	GO:0046503	glycerolipid catabolic process	8/417	65/18723	9.41479e-05	0.00325043	0.00274447	336/345/123745/335/338/337/116519/5408	8
GO:0070943	BP	GO:0070943	neutrophil-mediated killing of symbiont cell	4/417	12/18723	0.000104185	0.00352711	0.00297807	566/1991/2147/6338	4
GO:0072376	BP	GO:0072376	protein activation cascade	4/417	12/18723	0.000104185	0.00352711	0.00297807	462/2244/350/2266	4
GO:0007200	BP	GO:0007200	phospholipase C-activating G protein-coupled receptor signaling pathway	10/417	104/18723	0.000109151	0.00365971	0.00309004	51764/2147/796/6869/1113/183/147/2922/887/7432	10
GO:0051346	BP	GO:0051346	negative regulation of hydrolase activity	21/417	379/18723	0.000129041	0.00425208	0.0035902	336/199713/197/462/327657/345/335/1475/144568/149708/84651/5275/866/116/221476/183/5276/51050/5104/3053/3697	21
GO:0021895	BP	GO:0021895	cerebral cortex neuron differentiation	5/417	23/18723	0.000129257	0.00425208	0.0035902	1746/1745/7101/429/1996	5
GO:0016101	BP	GO:0016101	diterpenoid metabolic process	9/417	87/18723	0.000136822	0.00445887	0.0037648	6017/6121/5948/4036/131/7276/5406/1551/124	9
GO:0050804	BP	GO:0050804	modulation of chemical synaptic transmission	23/417	439/18723	0.000143462	0.00457574	0.00386348	9001/6532/7101/2897/6860/1056/107/4761/773/1996/10590/116/6855/183/9148/57497/1141/6616/9699/869/2899/7476/9370	23
GO:0033344	BP	GO:0033344	cholesterol efflux	8/417	69/18723	0.000144345	0.00457574	0.00386348	336/345/335/8435/338/337/116519/9370	8
GO:0060193	BP	GO:0060193	positive regulation of lipase activity	8/417	69/18723	0.000144345	0.00457574	0.00386348	335/337/116519/350/5319/5406/338328/183	8
GO:0099177	BP	GO:0099177	regulation of trans-synaptic signaling	23/417	440/18723	0.000148321	0.00465332	0.00392898	9001/6532/7101/2897/6860/1056/107/4761/773/1996/10590/116/6855/183/9148/57497/1141/6616/9699/869/2899/7476/9370	23
GO:0050829	BP	GO:0050829	defense response to Gram-negative bacterium	9/417	88/18723	0.000149461	0.00465332	0.00392898	566/1991/2147/3605/1671/84659/1673/1670/1113	9
GO:0003407	BP	GO:0003407	neural retina development	8/417	70/18723	0.000159848	0.00493266	0.00416484	1746/1745/3975/246213/6121/7021/4760/84465	8
GO:0019216	BP	GO:0019216	regulation of lipid metabolic process	19/417	331/18723	0.000170816	0.00522488	0.00441157	336/339221/345/1581/2147/9965/653/335/338/337/50487/116519/183/3952/6366/6363/1081/9370/1149	19
GO:0042475	BP	GO:0042475	odontogenesis of dentin-containing tooth	9/417	90/18723	0.000177674	0.0053418	0.00451029	1746/1745/1747/25928/2249/9313/8626/25818/4804	9
GO:0002385	BP	GO:0002385	mucosal immune response	6/417	38/18723	0.000177702	0.0053418	0.00451029	337/1671/1670/5319/6036/2813	6
GO:0010876	BP	GO:0010876	lipid localization	23/417	448/18723	0.000192762	0.00564442	0.0047658	336/4547/339221/345/1581/335/8435/338/337/50487/116519/350/80763/5319/1056/5406/183/3952/2167/5104/9370/1149/343702	23
GO:0021700	BP	GO:0021700	developmental maturation	17/417	280/18723	0.000192833	0.00564442	0.0047658	5047/50487/2266/6860/124925/54738/5798/429/4761/84530/6855/3952/9148/6366/8941/6363/4653	17
GO:0051952	BP	GO:0051952	regulation of amine transport	9/417	91/18723	0.000193363	0.00564442	0.0047658	6860/10991/1113/183/3952/1141/6861/7432/9607	9
GO:0046887	BP	GO:0046887	positive regulation of hormone secretion	11/417	133/18723	0.000194244	0.00564442	0.0047658	50487/2244/2266/114131/4826/2641/116/3952/3623/222546/2922	11
GO:0010896	BP	GO:0010896	regulation of triglyceride catabolic process	4/417	14/18723	0.000203357	0.00581235	0.0049076	345/335/337/116519	4
GO:0070942	BP	GO:0070942	neutrophil mediated cytotoxicity	4/417	14/18723	0.000203357	0.00581235	0.0049076	566/1991/2147/6338	4
GO:0051937	BP	GO:0051937	catecholamine transport	8/417	73/18723	0.000214783	0.006089	0.00514118	6860/6571/1113/183/1141/6861/7432/9607	8
GO:0046660	BP	GO:0046660	female sex differentiation	10/417	114/18723	0.000233773	0.0065259	0.00551007	174/3975/132625/1299/8626/4036/5798/116/3952/3623	10
GO:0050433	BP	GO:0050433	regulation of catecholamine secretion	7/417	56/18723	0.000233937	0.0065259	0.00551007	6860/1113/183/1141/6861/7432/9607	7
GO:0034114	BP	GO:0034114	regulation of heterotypic cell-cell adhesion	5/417	26/18723	0.000239162	0.00661871	0.00558844	246/335/2244/2266/9370	5
GO:0034754	BP	GO:0034754	cellular hormone metabolic process	11/417	137/18723	0.000251808	0.0069138	0.00583759	174/653/6338/3283/10720/6121/131/7276/5406/1551/124	11
GO:0034380	BP	GO:0034380	high-density lipoprotein particle assembly	4/417	15/18723	0.000272446	0.00739535	0.00624418	336/335/337/116519	4
GO:0002251	BP	GO:0002251	organ or tissue specific immune response	6/417	41/18723	0.000273588	0.00739535	0.00624418	337/1671/1670/5319/6036/2813	6
GO:0002227	BP	GO:0002227	innate immune response in mucosa	5/417	27/18723	0.000288191	0.00773016	0.00652688	337/1671/1670/5319/6036	5
GO:0050432	BP	GO:0050432	catecholamine secretion	7/417	58/18723	0.000291941	0.00777098	0.00656135	6860/1113/183/1141/6861/7432/9607	7
GO:0006721	BP	GO:0006721	terpenoid metabolic process	9/417	97/18723	0.000313642	0.00828537	0.00699566	6017/6121/5948/4036/131/7276/5406/1551/124	9
GO:0050796	BP	GO:0050796	regulation of insulin secretion	12/417	165/18723	0.000335075	0.00876785	0.00740304	7021/63036/114131/4826/2641/4760/1113/3952/6616/6833/222546/9607	12
GO:0032371	BP	GO:0032371	regulation of sterol transport	8/417	78/18723	0.000340158	0.00876785	0.00740304	336/339221/345/335/337/116519/3952/9370	8
GO:0032374	BP	GO:0032374	regulation of cholesterol transport	8/417	78/18723	0.000340158	0.00876785	0.00740304	336/339221/345/335/337/116519/3952/9370	8
GO:0045686	BP	GO:0045686	negative regulation of glial cell differentiation	5/417	28/18723	0.000344478	0.00876785	0.00740304	1746/1745/2147/79727/7101	5
GO:0050996	BP	GO:0050996	positive regulation of lipid catabolic process	5/417	28/18723	0.000344478	0.00876785	0.00740304	336/339221/335/337/116519	5
GO:0055088	BP	GO:0055088	lipid homeostasis	12/417	167/18723	0.000373991	0.00945004	0.00797904	336/4547/339221/345/1581/335/8435/338/337/116519/338328/2167	12
GO:0006641	BP	GO:0006641	triglyceride metabolic process	9/417	100/18723	0.000393761	0.00987802	0.0083404	336/4547/345/335/338/337/116519/350/5408	9
GO:0050994	BP	GO:0050994	regulation of lipid catabolic process	7/417	61/18723	0.000400062	0.0099644	0.00841333	336/339221/345/335/337/116519/1149	7
GO:0051961	BP	GO:0051961	negative regulation of nervous system development	11/417	145/18723	0.000410811	0.010088	0.0085177	1746/1745/2147/79727/7101/10683/116/6833/1620/869/7476	11
GO:0061351	BP	GO:0061351	neural precursor cell proliferation	11/417	145/18723	0.000410811	0.010088	0.0085177	6532/3975/131405/2637/7101/10642/4036/3642/429/116/7476	11
GO:0007189	BP	GO:0007189	adenylate cyclase-activating G protein-coupled receptor signaling pathway	11/417	146/18723	0.000435595	0.0106218	0.00896842	796/114131/107/2641/108/116/1113/799/147/155/7432	11
GO:0034308	BP	GO:0034308	primary alcohol metabolic process	9/417	102/18723	0.000456003	0.0110422	0.00932339	6822/653/6338/6121/131/7276/5406/1551/124	9
GO:0046890	BP	GO:0046890	regulation of lipid biosynthetic process	12/417	171/18723	0.000463374	0.0111433	0.00940877	339221/345/1581/9965/653/335/338/337/50487/116519/3952/1081	12
GO:0010951	BP	GO:0010951	negative regulation of endopeptidase activity	15/417	252/18723	0.00055666	0.013295	0.0112255	199713/197/462/327657/1475/144568/149708/84651/5275/866/183/5276/5104/3053/3697	15
GO:0055075	BP	GO:0055075	potassium ion homeostasis	5/417	31/18723	0.000563765	0.0133731	0.0112914	7380/6338/495/7021/496	5
GO:0097305	BP	GO:0097305	response to alcohol	15/417	253/18723	0.00057999	0.0136649	0.0115378	2742/1581/6338/3283/131/114131/107/108/1036/116/3952/1141/6366/6363/9370	15
GO:0048483	BP	GO:0048483	autonomic nervous system development	6/417	47/18723	0.000583905	0.0136649	0.0115378	2637/8626/7021/3642/429/401	6
GO:0007218	BP	GO:0007218	neuropeptide signaling pathway	9/417	106/18723	0.000604825	0.0140602	0.0118716	2742/796/6447/1363/2834/116/5697/2922/9607	9
GO:0021761	BP	GO:0021761	limbic system development	9/417	107/18723	0.00064765	0.014956	0.0126279	1746/1745/9001/7101/3283/4009/4760/8941/4808	9
GO:0019835	BP	GO:0019835	cytolysis	5/417	32/18723	0.000656074	0.0150509	0.012708	2147/731/3853/130120/730	5
GO:0042476	BP	GO:0042476	odontogenesis	10/417	130/18723	0.000668412	0.0152337	0.0128624	1746/1745/1747/8313/25928/2249/9313/8626/25818/4804	10
GO:2000177	BP	GO:2000177	regulation of neural precursor cell proliferation	8/417	87/18723	0.000712718	0.016138	0.0136259	6532/3975/131405/7101/4036/3642/429/116	8
GO:0042304	BP	GO:0042304	regulation of fatty acid biosynthetic process	6/417	49/18723	0.000732527	0.0164795	0.0139143	345/1581/335/337/50487/116519	6
GO:1905952	BP	GO:1905952	regulation of lipid localization	12/417	181/18723	0.000768539	0.0171788	0.0145047	336/339221/345/335/338/337/50487/116519/183/3952/9370/1149	12
GO:0042572	BP	GO:0042572	retinol metabolic process	6/417	50/18723	0.00081701	0.018146	0.0153213	6121/131/7276/5406/1551/124	6
GO:0001662	BP	GO:0001662	behavioral fear response	5/417	34/18723	0.000874058	0.0188633	0.015927	7101/27136/4761/116/1620	5
GO:0002446	BP	GO:0002446	neutrophil mediated immunity	5/417	34/18723	0.000874058	0.0188633	0.015927	566/1991/2147/6338/5319	5
GO:0034383	BP	GO:0034383	low-density lipoprotein particle clearance	5/417	34/18723	0.000874058	0.0188633	0.015927	345/8435/338/6833/9370	5
GO:0035137	BP	GO:0035137	hindlimb morphogenesis	5/417	34/18723	0.000874058	0.0188633	0.015927	2249/8626/9496/7021/7476	5
GO:0006883	BP	GO:0006883	cellular sodium ion homeostasis	4/417	20/18723	0.000885397	0.0188633	0.015927	495/496/183/730	4
GO:0043691	BP	GO:0043691	reverse cholesterol transport	4/417	20/18723	0.000885397	0.0188633	0.015927	336/345/335/337	4
GO:0042157	BP	GO:0042157	lipoprotein metabolic process	10/417	135/18723	0.000895901	0.0188633	0.015927	336/147111/4547/345/335/338/337/116519/80157/3952	10
GO:0002526	BP	GO:0002526	acute inflammatory response	9/417	112/18723	0.000900584	0.0188633	0.015927	336/1991/197/462/2147/5004/6288/130120/116	9
GO:0030900	BP	GO:0030900	forebrain development	19/417	379/18723	0.000906212	0.0188633	0.015927	1746/1745/9001/3975/2637/7101/3283/10642/4036/429/4009/4760/1996/116/5457/1141/8941/7476/4808	19
GO:0021872	BP	GO:0021872	forebrain generation of neurons	6/417	51/18723	0.000908814	0.0188633	0.015927	1746/1745/2637/7101/429/4808	6
GO:0045104	BP	GO:0045104	intermediate filament cytoskeleton organization	6/417	51/18723	0.000908814	0.0188633	0.015927	3857/5317/286887/3861/9118/1674	6
GO:0045861	BP	GO:0045861	negative regulation of proteolysis	18/417	351/18723	0.000949077	0.0195722	0.0165256	199713/197/462/327657/2147/1475/144568/149708/84651/5275/866/221476/183/5276/51050/5104/3053/3697	18
GO:0071347	BP	GO:0071347	cellular response to interleukin-1	9/417	113/18723	0.000959697	0.0195722	0.0165256	199713/6360/3605/2244/2266/27063/6366/9705/6363	9
GO:0002065	BP	GO:0002065	columnar/cuboidal epithelial cell differentiation	8/417	91/18723	0.000959807	0.0195722	0.0165256	1747/653/8626/3642/429/4760/5697/222546	8
GO:0002209	BP	GO:0002209	behavioral defense response	5/417	35/18723	0.00100131	0.0199424	0.0168381	7101/27136/4761/116/1620	5
GO:0008203	BP	GO:0008203	cholesterol metabolic process	10/417	137/18723	0.0010031	0.0199424	0.0168381	336/6822/1581/335/8435/338/337/116519/1056/3952	10
GO:0060078	BP	GO:0060078	regulation of postsynaptic membrane potential	10/417	137/18723	0.0010031	0.0199424	0.0168381	2742/2557/2897/124925/116/1141/9699/869/2899/7476	10
GO:0035176	BP	GO:0035176	social behavior	6/417	52/18723	0.00100836	0.0199424	0.0168381	6532/7101/9379/1141/1620/2922	6
GO:0045103	BP	GO:0045103	intermediate filament-based process	6/417	52/18723	0.00100836	0.0199424	0.0168381	3857/5317/286887/3861/9118/1674	6
GO:0006066	BP	GO:0006066	alcohol metabolic process	18/417	353/18723	0.00101228	0.0199424	0.0168381	336/6822/1581/653/335/8435/6338/338/337/6121/116519/131/7276/1056/5406/1551/3952/124	18
GO:0044242	BP	GO:0044242	cellular lipid catabolic process	13/417	214/18723	0.00106141	0.0207928	0.0175562	336/339221/345/123745/335/338/337/116519/219970/1056/5408/3952/9370	13
GO:0001906	BP	GO:0001906	cell killing	12/417	188/18723	0.00106991	0.0208424	0.017598	566/1991/2147/114771/6338/1671/1673/3853/1670/130120/1113/3952	12
GO:0006720	BP	GO:0006720	isoprenoid metabolic process	9/417	116/18723	0.00115617	0.0223215	0.0188469	6017/6121/5948/4036/131/7276/5406/1551/124	9
GO:0021548	BP	GO:0021548	pons development	3/417	10/18723	0.00117145	0.0223215	0.0188469	429/8941/401	3
GO:0035376	BP	GO:0035376	sterol import	3/417	10/18723	0.00117145	0.0223215	0.0188469	336/345/335	3
GO:0070508	BP	GO:0070508	cholesterol import	3/417	10/18723	0.00117145	0.0223215	0.0188469	336/345/335	3
GO:0050768	BP	GO:0050768	negative regulation of neurogenesis	10/417	140/18723	0.0011834	0.0224266	0.0189357	1746/1745/2147/79727/7101/10683/116/6833/1620/7476	10
GO:0051703	BP	GO:0051703	biological process involved in intraspecies interaction between organisms	6/417	54/18723	0.00123237	0.0232286	0.0196128	6532/7101/9379/1141/1620/2922	6
GO:0035296	BP	GO:0035296	regulation of tube diameter	10/417	141/18723	0.00124906	0.0232913	0.0196658	6532/6338/2244/796/2266/116/183/3952/147/155	10
GO:0097746	BP	GO:0097746	blood vessel diameter maintenance	10/417	141/18723	0.00124906	0.0232913	0.0196658	6532/6338/2244/796/2266/116/183/3952/147/155	10
GO:0046470	BP	GO:0046470	phosphatidylcholine metabolic process	7/417	74/18723	0.00128898	0.0239078	0.0201863	336/335/337/50487/116519/5319/5408	7
GO:0051954	BP	GO:0051954	positive regulation of amine transport	5/417	37/18723	0.0012964	0.0239183	0.0201951	10991/183/1141/7432/9607	5
GO:0035150	BP	GO:0035150	regulation of tube size	10/417	142/18723	0.00131767	0.0241827	0.0204184	6532/6338/2244/796/2266/116/183/3952/147/155	10
GO:0043270	BP	GO:0043270	positive regulation of ion transport	15/417	275/18723	0.00134933	0.0246341	0.0207995	9001/6532/2147/50487/5319/2641/10991/799/183/3952/342667/1141/644139/1272/6833	15
GO:0002067	BP	GO:0002067	glandular epithelial cell differentiation	6/417	55/18723	0.00135773	0.0246365	0.0208016	653/8626/3642/429/4760/222546	6
GO:0097529	BP	GO:0097529	myeloid leukocyte migration	13/417	220/18723	0.00136359	0.0246365	0.0208016	566/5800/6360/3605/6288/796/5319/2813/1113/7857/7060/6366/6363	13
GO:0007548	BP	GO:0007548	sex differentiation	15/417	276/18723	0.0013986	0.0251102	0.0212016	174/3975/132625/1299/400629/8626/4036/5798/56159/116/3952/3623/7476/1081/4808	15
GO:0048608	BP	GO:0048608	reproductive structure development	20/417	424/18723	0.00140422	0.0251102	0.0212016	174/1747/3975/132625/1299/653/400629/8626/4036/3481/5798/56159/116/3952/3623/150921/5104/7476/1081/4808	20
GO:0010742	BP	GO:0010742	macrophage derived foam cell differentiation	5/417	38/18723	0.0014659	0.0258161	0.0217976	8435/338/50487/183/9370	5
GO:0042596	BP	GO:0042596	fear response	5/417	38/18723	0.0014659	0.0258161	0.0217976	7101/27136/4761/116/1620	5
GO:0090077	BP	GO:0090077	foam cell differentiation	5/417	38/18723	0.0014659	0.0258161	0.0217976	8435/338/50487/183/9370	5
GO:0061458	BP	GO:0061458	reproductive system development	20/417	427/18723	0.00152659	0.0267498	0.0225859	174/1747/3975/132625/1299/653/400629/8626/4036/3481/5798/56159/116/3952/3623/150921/5104/7476/1081/4808	20
GO:0045723	BP	GO:0045723	positive regulation of fatty acid biosynthetic process	4/417	23/18723	0.00153505	0.0267635	0.0225975	335/337/50487/116519	4
GO:0002759	BP	GO:0002759	regulation of antimicrobial humoral response	3/417	11/18723	0.00158423	0.0270794	0.0228642	25818/3605/354	3
GO:0021892	BP	GO:0021892	cerebral cortex GABAergic interneuron differentiation	3/417	11/18723	0.00158423	0.0270794	0.0228642	1746/1745/429	3
GO:0051610	BP	GO:0051610	serotonin uptake	3/417	11/18723	0.00158423	0.0270794	0.0228642	6532/6571/6570	3
GO:0051673	BP	GO:0051673	membrane disruption in other organism	3/417	11/18723	0.00158423	0.0270794	0.0228642	1671/84659/1670	3
GO:0007043	BP	GO:0007043	cell-cell junction assembly	10/417	146/18723	0.00162348	0.0275454	0.0232576	1828/5800/149461/3605/64405/1010/5317/183/1501/9071	10
GO:0031016	BP	GO:0031016	pancreas development	7/417	77/18723	0.00162729	0.0275454	0.0232576	653/3481/3642/4760/5078/222546/3175	7
GO:0045923	BP	GO:0045923	positive regulation of fatty acid metabolic process	5/417	39/18723	0.00165116	0.0277969	0.02347	335/337/50487/116519/9370	5
GO:0007631	BP	GO:0007631	feeding behavior	8/417	99/18723	0.00165809	0.0277969	0.02347	796/2834/2641/5697/183/3952/5457/9607	8
GO:0007219	BP	GO:0007219	Notch signaling pathway	11/417	172/18723	0.00168032	0.0280347	0.0236708	1746/1745/8626/3605/8788/429/10683/92737/9148/1272/3175	11
GO:1902652	BP	GO:1902652	secondary alcohol metabolic process	10/417	147/18723	0.00170829	0.0283658	0.0239503	336/6822/1581/335/8435/338/337/116519/1056/3952	10
GO:0006694	BP	GO:0006694	steroid biosynthetic process	11/417	173/18723	0.00175948	0.0290773	0.0245511	1581/9965/653/335/338/3283/337/116519/1551/3952/1081	11
GO:0010226	BP	GO:0010226	response to lithium ion	4/417	24/18723	0.00180999	0.0296707	0.0250522	284111/107/429/2167	4
GO:0099003	BP	GO:0099003	vesicle-mediated transport in synapse	12/417	200/18723	0.00181241	0.0296707	0.0250522	246213/1056/6571/107/6570/6855/6616/6456/9699/50632/6861/7476	12
GO:0032368	BP	GO:0032368	regulation of lipid transport	10/417	149/18723	0.00188867	0.0307747	0.0259843	336/339221/345/335/337/50487/116519/183/3952/9370	10
GO:0017157	BP	GO:0017157	regulation of exocytosis	12/417	202/18723	0.00196982	0.0319477	0.0269747	9001/50487/2244/2266/6860/107/6855/9515/8941/9699/6861/7476	12
GO:0021766	BP	GO:0021766	hippocampus development	7/417	80/18723	0.00203094	0.0327865	0.0276829	1746/1745/7101/3283/4009/4760/8941	7
GO:0032096	BP	GO:0032096	negative regulation of response to food	3/417	12/18723	0.00207758	0.0328839	0.0277652	80763/3952/9607	3
GO:0032099	BP	GO:0032099	negative regulation of appetite	3/417	12/18723	0.00207758	0.0328839	0.0277652	80763/3952/9607	3
GO:0032105	BP	GO:0032105	negative regulation of response to extracellular stimulus	3/417	12/18723	0.00207758	0.0328839	0.0277652	80763/3952/9607	3
GO:0032108	BP	GO:0032108	negative regulation of response to nutrient levels	3/417	12/18723	0.00207758	0.0328839	0.0277652	80763/3952/9607	3
GO:0055067	BP	GO:0055067	monovalent inorganic cation homeostasis	10/417	151/18723	0.00208413	0.0328839	0.0277652	7380/6338/51458/495/7021/496/80763/183/730/887	10
GO:0042730	BP	GO:0042730	fibrinolysis	4/417	25/18723	0.00211728	0.0330527	0.0279077	2147/2244/350/2266	4
GO:0045109	BP	GO:0045109	intermediate filament organization	4/417	25/18723	0.00211728	0.0330527	0.0279077	3857/5317/3861/1674	4
GO:0014013	BP	GO:0014013	regulation of gliogenesis	8/417	103/18723	0.00213274	0.0330527	0.0279077	1746/1745/2147/79727/7101/4036/116/6833	8
GO:0090277	BP	GO:0090277	positive regulation of peptide hormone secretion	8/417	103/18723	0.00213274	0.0330527	0.0279077	2244/2266/114131/4826/2641/116/222546/2922	8
GO:0035270	BP	GO:0035270	endocrine system development	9/417	127/18723	0.00217171	0.0335077	0.0282919	653/335/3642/429/4760/116/222546/1081/3175	9
GO:0016125	BP	GO:0016125	sterol metabolic process	10/417	152/18723	0.00218779	0.0336072	0.0283758	336/6822/1581/335/8435/338/337/116519/1056/3952	10
GO:0050878	BP	GO:0050878	regulation of body fluid levels	18/417	379/18723	0.00222109	0.033969	0.0286814	462/5800/2147/8626/6338/7021/2244/6288/350/2266/63036/1056/7166/1036/9148/359/3053/7432	18
GO:0006639	BP	GO:0006639	acylglycerol metabolic process	9/417	128/18723	0.00229119	0.0345728	0.0291912	336/4547/345/335/338/337/116519/350/5408	9
GO:0120254	BP	GO:0120254	olefinic compound metabolic process	10/417	153/18723	0.00229556	0.0345728	0.0291912	174/246/653/6338/6121/131/7276/5406/1551/124	10
GO:0021879	BP	GO:0021879	forebrain neuron differentiation	5/417	42/18723	0.00231014	0.0345728	0.0291912	1746/1745/2637/429/4808	5
GO:0055090	BP	GO:0055090	acylglycerol homeostasis	5/417	42/18723	0.00231014	0.0345728	0.0291912	345/335/337/116519/338328	5
GO:0070328	BP	GO:0070328	triglyceride homeostasis	5/417	42/18723	0.00231014	0.0345728	0.0291912	345/335/337/116519/338328	5
GO:0046889	BP	GO:0046889	positive regulation of lipid biosynthetic process	7/417	82/18723	0.00234032	0.0348747	0.0294461	339221/1581/335/337/50487/116519/1081	7
GO:0010721	BP	GO:0010721	negative regulation of cell development	11/417	180/18723	0.00240298	0.0356562	0.0301059	1746/1745/2147/79727/7101/5047/10683/116/6833/1620/7476	11
GO:0006638	BP	GO:0006638	neutral lipid metabolic process	9/417	129/18723	0.00241584	0.035695	0.0301387	336/4547/345/335/338/337/116519/350/5408	9
GO:0045745	BP	GO:0045745	positive regulation of G protein-coupled receptor signaling pathway	4/417	26/18723	0.00245875	0.0361759	0.0305447	2147/25818/1113/2922	4
GO:0099504	BP	GO:0099504	synaptic vesicle cycle	11/417	181/18723	0.00250874	0.0367562	0.0310347	246213/1056/6571/107/6570/6855/6616/6456/9699/6861/7476	11
GO:0002793	BP	GO:0002793	positive regulation of peptide secretion	8/417	106/18723	0.00255414	0.0372647	0.0314641	2244/2266/114131/4826/2641/116/222546/2922	8
GO:0097154	BP	GO:0097154	GABAergic neuron differentiation	3/417	13/18723	0.00265649	0.0385966	0.0325887	1746/1745/429	3
GO:0042310	BP	GO:0042310	vasoconstriction	7/417	84/18723	0.0026848	0.0388461	0.0327992	6532/6338/2244/2266/183/3952/147	7
GO:0035116	BP	GO:0035116	embryonic hindlimb morphogenesis	4/417	27/18723	0.00283624	0.0408677	0.0345062	2249/8626/9496/7476	4
GO:0034329	BP	GO:0034329	cell junction assembly	19/417	420/18723	0.00291742	0.0418644	0.0353478	1828/5800/149461/3605/64405/1010/5317/1056/92737/84631/9379/183/1501/5457/1141/9071/869/7476/4653	19
GO:0010565	BP	GO:0010565	regulation of cellular ketone metabolic process	9/417	133/18723	0.00296928	0.0422735	0.0356932	345/1581/9965/653/335/337/50487/116519/9370	9
GO:0046888	BP	GO:0046888	negative regulation of hormone secretion	6/417	64/18723	0.00297018	0.0422735	0.0356932	1113/3952/3623/6833/9370/9607	6
GO:0006813	BP	GO:0006813	potassium ion transport	13/417	241/18723	0.00303648	0.0430372	0.036338	495/496/3777/3764/90134/81033/9312/116/6616/6833/3739/1804/7432	13
GO:0001505	BP	GO:0001505	regulation of neurotransmitter levels	12/417	213/18723	0.00304852	0.0430372	0.036338	6532/6860/6571/107/9379/6570/6855/6616/9699/6861/7476/2572	12
GO:0008217	BP	GO:0008217	regulation of blood pressure	11/417	186/18723	0.00309546	0.0435236	0.0367487	5800/796/80763/1113/183/3952/147/155/354/9370/9607	11
GO:0003014	BP	GO:0003014	renal system process	8/417	110/18723	0.00321425	0.0450124	0.0380057	5800/7021/80763/183/1141/57156/359/9370	8
GO:0010838	BP	GO:0010838	positive regulation of keratinocyte proliferation	3/417	14/18723	0.00332553	0.0461997	0.0390082	7051/8626/130120	3
GO:0033605	BP	GO:0033605	positive regulation of catecholamine secretion	3/417	14/18723	0.00332553	0.0461997	0.0390082	1141/7432/9607	3
GO:0031018	BP	GO:0031018	endocrine pancreas development	5/417	46/18723	0.0034621	0.0479062	0.040449	653/3642/4760/222546/3175	5
GO:0055074	BP	GO:0055074	calcium ion homeostasis	20/417	460/18723	0.00358885	0.0494637	0.0417642	1991/9001/2147/7021/6288/796/5319/6869/3777/11330/773/10590/116/79054/799/183/147/6366/6363/887	20
GO:0001533	CC	GO:0001533	cornified envelope	13/436	45/19550	1.07914e-11	3.65828e-09	2.91935e-09	1828/7051/84518/147409/1475/5317/6703/126638/6705/3713/6707/6698/6704	13
GO:0042627	CC	GO:0042627	chylomicron	7/436	13/19550	3.99794e-09	6.7765e-07	5.40773e-07	336/345/335/338/337/116519/350	7
GO:0030658	CC	GO:0030658	transport vesicle membrane	20/436	212/19550	6.4497e-08	7.28816e-06	5.81604e-06	246213/23546/762/6860/6571/5798/1363/9899/388662/29106/10590/6570/6855/6456/6833/6861/55530/359/2572/6572	20
GO:0034364	CC	GO:0034364	high-density lipoprotein particle	8/436	27/19550	8.78485e-08	7.44516e-06	5.94133e-06	336/345/335/338/337/116519/6288/350	8
GO:0034361	CC	GO:0034361	very-low-density lipoprotein particle	7/436	20/19550	1.57731e-07	8.26394e-06	6.59473e-06	336/345/335/338/337/116519/350	7
GO:0034385	CC	GO:0034385	triglyceride-rich plasma lipoprotein particle	7/436	20/19550	1.57731e-07	8.26394e-06	6.59473e-06	336/345/335/338/337/116519/350	7
GO:0072562	CC	GO:0072562	blood microparticle	16/436	146/19550	1.74568e-07	8.26394e-06	6.59473e-06	336/7018/197/462/2147/5004/335/337/1370/213/2244/731/2266/5644/183/3697	16
GO:0030133	CC	GO:0030133	transport vesicle	28/436	412/19550	1.95019e-07	8.26394e-06	6.59473e-06	9001/246213/23546/762/1670/80763/6860/6571/5798/5122/1363/9899/388662/29106/10590/1113/6570/6855/6616/6456/6833/5126/140767/6861/55530/359/2572/6572	28
GO:0005788	CC	GO:0005788	endoplasmic reticulum lumen	23/436	313/19550	6.38121e-07	2.40359e-05	1.91809e-05	336/174/147111/7018/197/462/4547/1299/2147/1280/335/338/337/213/116519/2266/121506/2641/29106/7857/91851/7476/3053	23
GO:0030672	CC	GO:0030672	synaptic vesicle membrane	13/436	109/19550	9.47405e-07	2.61837e-05	2.08949e-05	246213/23546/6860/6571/9899/388662/6570/6855/6456/6833/6861/55530/2572	13
GO:0099501	CC	GO:0099501	exocytic vesicle membrane	13/436	109/19550	9.47405e-07	2.61837e-05	2.08949e-05	246213/23546/6860/6571/9899/388662/6570/6855/6456/6833/6861/55530/2572	13
GO:0034358	CC	GO:0034358	plasma lipoprotein particle	8/436	36/19550	1.00409e-06	2.61837e-05	2.08949e-05	336/345/335/338/337/116519/6288/350	8
GO:1990777	CC	GO:1990777	lipoprotein particle	8/436	36/19550	1.00409e-06	2.61837e-05	2.08949e-05	336/345/335/338/337/116519/6288/350	8
GO:0062023	CC	GO:0062023	collagen-containing extracellular matrix	27/436	425/19550	1.20165e-06	2.90972e-05	2.32199e-05	1991/7047/197/462/1299/345/2147/1280/5004/335/337/2244/350/2266/5644/10216/2267/127435/5549/183/7060/5104/869/3697/4583/9370/4653	27
GO:0032994	CC	GO:0032994	protein-lipid complex	8/436	39/19550	1.92526e-06	4.35109e-05	3.47222e-05	336/345/335/338/337/116519/6288/350	8
GO:0150034	CC	GO:0150034	distal axon	21/436	294/19550	3.07341e-06	6.5118e-05	5.1965e-05	9001/5800/246213/10642/796/114131/6571/5798/3800/1996/10590/116/4804/6570/6855/6616/8941/11075/140767/2899/6572	21
GO:0044306	CC	GO:0044306	neuron projection terminus	13/436	141/19550	1.68141e-05	0.000335293	0.000267568	246213/796/6860/114131/6571/5798/10590/116/6570/6855/2899/11341/6572	13
GO:0043195	CC	GO:0043195	terminal bouton	8/436	55/19550	2.78927e-05	0.000525313	0.000419206	796/6571/10590/116/6570/6855/2899/6572	8
GO:0005882	CC	GO:0005882	intermediate filament	16/436	217/19550	3.11632e-05	0.000556017	0.000443708	3866/3857/3859/390792/5317/3852/125115/286887/196374/3860/3851/3853/3861/192666/9118/1674	16
GO:0031983	CC	GO:0031983	vesicle lumen	20/436	327/19550	4.98473e-05	0.000844912	0.000674251	4353/566/1991/7018/197/5004/335/338/213/3481/2244/350/7276/2266/1670/5122/2641/6036/29106/2922	20
GO:0008021	CC	GO:0008021	synaptic vesicle	15/436	206/19550	6.32278e-05	0.00102068	0.000814514	9001/246213/23546/6860/6571/9899/388662/6570/6855/6616/6456/6833/6861/55530/2572	15
GO:0043679	CC	GO:0043679	axon terminus	11/436	122/19550	9.11989e-05	0.00140529	0.00112144	246213/796/114131/6571/5798/10590/116/6570/6855/2899/6572	11
GO:0060198	CC	GO:0060198	clathrin-sculpted vesicle	4/436	12/19550	0.00010478	0.00148002	0.00118108	6571/6570/2572/6572	4
GO:0098992	CC	GO:0098992	neuronal dense core vesicle	4/436	12/19550	0.00010478	0.00148002	0.00118108	6860/1113/7857/6861	4
GO:0005796	CC	GO:0005796	Golgi lumen	10/436	104/19550	0.000110661	0.00150056	0.00119747	118430/2147/1671/1673/394263/1670/5549/7476/1081/4583	10
GO:0034774	CC	GO:0034774	secretory granule lumen	19/436	322/19550	0.000122599	0.0015985	0.00127562	4353/566/1991/7018/197/5004/335/213/3481/2244/350/7276/2266/1670/5122/2641/6036/29106/2922	19
GO:0060205	CC	GO:0060205	cytoplasmic vesicle lumen	19/436	325/19550	0.000138268	0.00173603	0.00138537	4353/566/1991/7018/197/5004/335/213/3481/2244/350/7276/2266/1670/5122/2641/6036/29106/2922	19
GO:0070382	CC	GO:0070382	exocytic vesicle	15/436	224/19550	0.00016125	0.00195227	0.00155794	9001/246213/23546/6860/6571/9899/388662/6570/6855/6616/6456/6833/6861/55530/2572	15
GO:0043204	CC	GO:0043204	perikaryon	12/436	158/19550	0.000228238	0.00259817	0.00207337	246213/5798/1996/9312/116/4804/1501/9148/58157/5126/2899/7432	12
GO:0016324	CC	GO:0016324	apical plasma membrane	20/436	367/19550	0.000236964	0.00259817	0.00207337	7018/5800/55867/11045/6514/762/7380/6338/4036/51458/495/22802/4118/496/60676/10991/338328/2813/146894/359	20
GO:0045111	CC	GO:0045111	intermediate filament cytoskeleton	16/436	258/19550	0.000237591	0.00259817	0.00207337	3866/3857/3859/390792/5317/3852/125115/286887/196374/3860/3851/3853/3861/192666/9118/1674	16
GO:0031045	CC	GO:0031045	dense core granule	5/436	27/19550	0.000290201	0.00307432	0.00245335	80763/6860/1113/7857/6861	5
GO:0045177	CC	GO:0045177	apical part of cell	21/436	435/19550	0.000823931	0.00846402	0.0067544	7018/5800/55867/11045/6514/762/7380/6338/4036/51458/495/22802/4118/496/343/60676/10991/338328/2813/146894/359	21
GO:0031362	CC	GO:0031362	anchored component of external side of plasma membrane	4/436	20/19550	0.000890243	0.00887625	0.00708336	762/338328/2813/23627	4
GO:0071682	CC	GO:0071682	endocytic vesicle lumen	4/436	23/19550	0.00154331	0.014948	0.0119287	4353/335/338/6288	4
GO:0098936	CC	GO:0098936	intrinsic component of postsynaptic membrane	9/436	122/19550	0.00166468	0.0156757	0.0125094	6532/5800/2557/1056/107/84631/57497/1141/1272	9
GO:0031233	CC	GO:0031233	intrinsic component of external side of plasma membrane	4/436	24/19550	0.00181968	0.0166722	0.0133046	762/338328/2813/23627	4
GO:0097060	CC	GO:0097060	synaptic membrane	18/436	384/19550	0.00260535	0.0232424	0.0185478	6532/5800/2742/2557/2897/1056/107/84631/6855/57497/1141/6616/1272/9699/9568/869/2899/2572	18
GO:0031093	CC	GO:0031093	platelet alpha granule lumen	6/436	67/19550	0.00376722	0.0327458	0.0261316	197/5004/213/3481/2244/2266	6
GO:0045211	CC	GO:0045211	postsynaptic membrane	14/436	277/19550	0.00390126	0.0330632	0.0263849	6532/5800/2742/2557/2897/1056/107/84631/57497/1141/1272/9568/869/2899	14
GO:0031091	CC	GO:0031091	platelet alpha granule	7/436	91/19550	0.00423937	0.0350524	0.0279722	197/5004/213/3481/2244/2266/5104	7
GO:0030665	CC	GO:0030665	clathrin-coated vesicle membrane	8/436	116/19550	0.00448583	0.0362071	0.0288937	7018/338/4036/6571/6570/6456/2572/6572	8
GO:0099055	CC	GO:0099055	integral component of postsynaptic membrane	8/436	117/19550	0.00472389	0.0372419	0.0297195	6532/5800/2557/1056/107/84631/57497/1141	8
GO:0031225	CC	GO:0031225	anchored component of membrane	10/436	170/19550	0.00492987	0.0379824	0.0303105	64180/248/762/80740/338328/2813/23627/1272/2572/137797	10
GO:0045095	CC	GO:0045095	keratin filament	7/436	96/19550	0.00568112	0.0427977	0.0341531	3852/286887/196374/3860/3851/3853/3861	7
GO:0042599	CC	GO:0042599	lamellar body	3/436	17/19550	0.00593574	0.0437438	0.0349081	25818/388533/6439	3
GO:0030426	CC	GO:0030426	growth cone	10/436	177/19550	0.00651126	0.0462858	0.0369367	9001/5800/10642/3800/1996/4804/6616/8941/11075/140767	10
GO:0099060	CC	GO:0099060	integral component of postsynaptic specialization membrane	6/436	75/19550	0.00655375	0.0462858	0.0369367	5800/2557/1056/107/57497/1141	6
GO:0009897	CC	GO:0009897	external side of plasma membrane	18/436	421/19550	0.00671355	0.0464468	0.0370651	7018/55867/2147/762/80740/6338/3605/3543/4036/2244/2266/338328/2813/79054/23627/1141/9244/5104	18
GO:0090533	CC	GO:0090533	cation-transporting ATPase complex	3/436	18/19550	0.0070064	0.0465719	0.037165	496/3764/6833	3
GO:0097440	CC	GO:0097440	apical dendrite	3/436	18/19550	0.0070064	0.0465719	0.037165	246213/124925/9148	3
GO:0030285	CC	GO:0030285	integral component of synaptic vesicle membrane	4/436	35/19550	0.00739611	0.0473072	0.0377517	246213/6860/388662/6855	4
GO:0031904	CC	GO:0031904	endosome lumen	4/436	35/19550	0.00739611	0.0473072	0.0377517	338/4036/5222/6439	4
GO:0098685	CC	GO:0098685	Schaffer collateral - CA1 synapse	6/436	78/19550	0.00790892	0.0487477	0.0389013	9118/107/6855/57497/6456/7476	6
GO:0098948	CC	GO:0098948	intrinsic component of postsynaptic specialization membrane	6/436	78/19550	0.00790892	0.0487477	0.0389013	5800/2557/1056/107/57497/1141	6
GO:0030427	CC	GO:0030427	site of polarized growth	10/436	183/19550	0.00815813	0.0493858	0.0394105	9001/5800/10642/3800/1996/4804/6616/8941/11075/140767	10
GO:0048018	MF	GO:0048018	receptor ligand activity	39/419	487/18368	1.02422e-11	4.74808e-09	3.94531e-09	6360/2249/2147/9965/653/27189/8909/335/3605/3481/57152/7276/26525/1673/796/4295/387695/2520/80763/114131/2641/92304/116/5697/183/3952/27178/7857/9244/7060/6366/3623/6363/2922/7476/1081/9370/7432/9607	39
GO:0030546	MF	GO:0030546	signaling receptor activator activity	39/419	495/18368	1.68074e-11	4.74808e-09	3.94531e-09	6360/2249/2147/9965/653/27189/8909/335/3605/3481/57152/7276/26525/1673/796/4295/387695/2520/80763/114131/2641/92304/116/5697/183/3952/27178/7857/9244/7060/6366/3623/6363/2922/7476/1081/9370/7432/9607	39
GO:0005179	MF	GO:0005179	hormone activity	18/419	122/18368	3.31589e-10	6.24493e-08	5.18908e-08	3481/7276/796/4295/2520/80763/114131/2641/116/5697/183/3952/3623/2922/1081/9370/7432/9607	18
GO:0008236	MF	GO:0008236	serine-type peptidase activity	20/419	191/18368	1.58687e-08	2.24146e-06	1.86249e-06	566/1991/29122/5651/2147/8909/25818/26085/28983/9407/339967/63036/5644/5122/11330/23436/51032/5126/354/1804	20
GO:0017171	MF	GO:0017171	serine hydrolase activity	20/419	195/18368	2.25815e-08	2.55171e-06	2.12029e-06	566/1991/29122/5651/2147/8909/25818/26085/28983/9407/339967/63036/5644/5122/11330/23436/51032/5126/354/1804	20
GO:0004252	MF	GO:0004252	serine-type endopeptidase activity	18/419	174/18368	1.00446e-07	9.4587e-06	7.85949e-06	566/1991/29122/5651/2147/25818/26085/28983/9407/339967/63036/5644/5122/11330/23436/51032/5126/354	18
GO:0030414	MF	GO:0030414	peptidase inhibitor activity	17/419	187/18368	1.42281e-06	0.000104264	8.66361e-05	199713/197/462/327657/1475/144568/149708/84651/5275/866/221476/183/5276/51050/5104/3053/3697	17
GO:0005539	MF	GO:0005539	glycosaminoglycan binding	19/419	230/18368	1.47631e-06	0.000104264	8.66361e-05	4353/566/1991/462/2249/2147/114771/338/116519/6288/84659/350/1056/130120/5549/7060/5104/3053/5968	19
GO:0004867	MF	GO:0004867	serine-type endopeptidase inhibitor activity	12/419	98/18368	2.34698e-06	0.000147338	0.000122427	462/327657/144568/149708/84651/5275/866/183/5276/5104/3053/3697	12
GO:0061134	MF	GO:0061134	peptidase regulator activity	18/419	230/18368	5.95888e-06	0.000326795	0.000271543	199713/197/462/327657/1475/144568/149708/84651/4118/5275/866/221476/183/5276/51050/5104/3053/3697	18
GO:0008201	MF	GO:0008201	heparin binding	15/419	166/18368	6.36238e-06	0.000326795	0.000271543	4353/566/1991/462/2249/2147/338/116519/6288/350/1056/5549/7060/5104/3053	15
GO:0004866	MF	GO:0004866	endopeptidase inhibitor activity	15/419	180/18368	1.69024e-05	0.00079582	0.000661268	199713/197/462/327657/1475/144568/149708/84651/5275/866/183/5276/5104/3053/3697	15
GO:0043178	MF	GO:0043178	alcohol binding	10/419	89/18368	3.49662e-05	0.00151969	0.00126275	336/345/6017/335/8435/337/116519/5948/131/6855	10
GO:1901681	MF	GO:1901681	sulfur compound binding	18/419	265/18368	4.04011e-05	0.00153279	0.00127364	4353/566/1991/6822/462/2249/2147/8435/338/116519/442038/6288/350/1056/5549/7060/5104/3053	18
GO:0061135	MF	GO:0061135	endopeptidase regulator activity	15/419	194/18368	4.06936e-05	0.00153279	0.00127364	199713/197/462/327657/1475/144568/149708/84651/5275/866/183/5276/5104/3053/3697	15
GO:0015267	MF	GO:0015267	channel activity	26/419	480/18368	4.55473e-05	0.00156713	0.00130217	2742/6338/2557/347741/22802/9635/2897/343/375318/3777/653437/3764/90134/81033/773/9312/6328/79054/1141/6616/285175/6833/3739/57156/2899/359	26
GO:0022803	MF	GO:0022803	passive transmembrane transporter activity	26/419	481/18368	4.71526e-05	0.00156713	0.00130217	2742/6338/2557/347741/22802/9635/2897/343/375318/3777/653437/3764/90134/81033/773/9312/6328/79054/1141/6616/285175/6833/3739/57156/2899/359	26
GO:0005184	MF	GO:0005184	neuropeptide hormone activity	6/419	30/18368	5.07278e-05	0.00159229	0.00132308	80763/116/5697/2922/7432/9607	6
GO:0004175	MF	GO:0004175	endopeptidase activity	24/419	430/18368	5.59126e-05	0.00166266	0.00138155	566/1991/29122/5651/2147/440854/9313/25818/26085/22802/9635/28983/9407/339967/5222/63036/5644/5122/11330/60676/23436/51032/5126/354	24
GO:0031210	MF	GO:0031210	phosphatidylcholine binding	6/419	31/18368	6.17009e-05	0.00174305	0.00144835	336/335/337/6121/116519/5104	6
GO:0005125	MF	GO:0005125	cytokine activity	16/419	235/18368	0.000104384	0.00280842	0.00233359	6360/653/27189/3605/57152/26525/387695/92304/27178/7857/9244/6366/3623/6363/7476/9370	16
GO:0022836	MF	GO:0022836	gated channel activity	20/419	340/18368	0.000114546	0.00283127	0.00235258	2742/6338/2557/22802/9635/2897/3777/3764/90134/81033/773/9312/6328/79054/1141/6616/6833/3739/57156/2899	20
GO:0120020	MF	GO:0120020	cholesterol transfer activity	5/419	22/18368	0.000115255	0.00283127	0.00235258	336/4547/335/338/337	5
GO:0015485	MF	GO:0015485	cholesterol binding	7/419	50/18368	0.000130955	0.00308289	0.00256166	336/345/335/8435/337/116519/6855	7
GO:0120015	MF	GO:0120015	sterol transfer activity	5/419	23/18368	0.000144528	0.00326633	0.00271408	336/4547/335/338/337	5
GO:0001664	MF	GO:0001664	G protein-coupled receptor binding	18/419	295/18368	0.000158797	0.00345078	0.00286734	25805/6360/6288/1673/796/4295/387695/114131/2641/8643/116/5697/183/6366/6363/887/7476/4653	18
GO:0004089	MF	GO:0004089	carbonate dehydratase activity	4/419	14/18368	0.000222832	0.00456644	0.00379438	759/765/762/56934	4
GO:0015079	MF	GO:0015079	potassium ion transmembrane transporter activity	12/419	155/18368	0.00023364	0.00456644	0.00379438	495/496/2897/3777/3764/90134/81033/9312/6616/6833/3739/2899	12
GO:0050997	MF	GO:0050997	quaternary ammonium group binding	6/419	39/18368	0.000234384	0.00456644	0.00379438	336/335/337/6121/116519/5104	6
GO:0070325	MF	GO:0070325	lipoprotein particle receptor binding	5/419	28/18368	0.000384321	0.00723804	0.00601429	336/345/335/338/116519	5
GO:0005216	MF	GO:0005216	ion channel activity	22/419	432/18368	0.000408496	0.00735288	0.0061097	2742/6338/2557/347741/22802/9635/2897/3777/3764/90134/81033/773/9312/6328/79054/1141/6616/285175/6833/3739/57156/2899	22
GO:0032934	MF	GO:0032934	sterol binding	7/419	60/18368	0.000416446	0.00735288	0.0061097	336/345/335/8435/337/116519/6855	7
GO:0005267	MF	GO:0005267	potassium channel activity	10/419	121/18368	0.000456312	0.00781262	0.00649171	2897/3777/3764/90134/81033/9312/6616/6833/3739/2899	10
GO:0016755	MF	GO:0016755	aminoacyltransferase activity	4/419	18/18368	0.00063364	0.0102288	0.00849935	7047/7051/7053/9333	4
GO:0042834	MF	GO:0042834	peptidoglycan binding	4/419	18/18368	0.00063364	0.0102288	0.00849935	114771/84659/130120/5968	4
GO:0005261	MF	GO:0005261	cation channel activity	18/419	335/18368	0.000729202	0.0114444	0.00950948	6338/347741/2897/3777/3764/90134/81033/773/9312/6328/79054/1141/6616/285175/6833/3739/57156/2899	18
GO:0051427	MF	GO:0051427	hormone receptor binding	5/419	33/18368	0.000845193	0.0129063	0.0107242	114131/116/3952/2167/7432	5
GO:0046873	MF	GO:0046873	metal ion transmembrane transporter activity	21/419	430/18368	0.000937792	0.0139435	0.011586	6532/6338/29986/284111/495/496/2897/6571/3777/3764/90134/81033/773/9312/6328/6570/79054/6616/6833/3739/2899	21
GO:0005249	MF	GO:0005249	voltage-gated potassium channel activity	8/419	90/18368	0.00104003	0.0150671	0.0125196	3777/3764/90134/81033/9312/6616/6833/3739	8
GO:0051428	MF	GO:0051428	peptide hormone receptor binding	4/419	21/18368	0.00117404	0.0165833	0.0137795	114131/116/3952/7432	4
GO:0015643	MF	GO:0015643	toxic substance binding	3/419	10/18368	0.0012551	0.0170765	0.0141893	566/1828/213	3
GO:0015248	MF	GO:0015248	sterol transporter activity	5/419	36/18368	0.0012694	0.0170765	0.0141893	336/4547/335/338/337	5
GO:0015276	MF	GO:0015276	ligand-gated ion channel activity	10/419	143/18368	0.00165663	0.0212726	0.017676	2742/6338/2557/9635/2897/3764/79054/1141/6833/2899	10
GO:0022834	MF	GO:0022834	ligand-gated channel activity	10/419	143/18368	0.00165663	0.0212726	0.017676	2742/6338/2557/9635/2897/3764/79054/1141/6833/2899	10
GO:0015378	MF	GO:0015378	sodium:chloride symporter activity	3/419	11/18368	0.00169667	0.0213027	0.017701	6532/6571/6570	3
GO:0052689	MF	GO:0052689	carboxylic ester hydrolase activity	10/419	147/18368	0.00203319	0.0246558	0.0204871	147111/759/123745/50487/6121/5407/5319/1056/5408/5406	10
GO:0005496	MF	GO:0005496	steroid binding	8/419	100/18368	0.00205101	0.0246558	0.0204871	336/345/335/8435/337/116519/866/6855	8
GO:0005200	MF	GO:0005200	structural constituent of cytoskeleton	8/419	103/18368	0.00247071	0.0290823	0.0241653	7278/3866/3857/3852/3853/3861/9118/1674	8
GO:0004806	MF	GO:0004806	triglyceride lipase activity	4/419	26/18368	0.00268049	0.0309077	0.025682	5407/1056/5408/5406	4
GO:0016298	MF	GO:0016298	lipase activity	9/419	129/18368	0.00283164	0.0319975	0.0265876	147111/339221/123745/50487/5407/5319/1056/5408/5406	9
GO:1904315	MF	GO:1904315	transmitter-gated ion channel activity involved in regulation of postsynaptic membrane potential	5/419	44/18368	0.00315094	0.0349075	0.0290056	2742/2557/2897/1141/2899	5
GO:0015373	MF	GO:0015373	anion:sodium symporter activity	3/419	14/18368	0.00355729	0.0386513	0.0321164	6532/6571/6570	3
GO:0099529	MF	GO:0099529	neurotransmitter receptor activity involved in regulation of postsynaptic membrane potential	5/419	47/18368	0.00420968	0.0448767	0.0372893	2742/2557/2897/1141/2899	5
GO:0030280	MF	GO:0030280	structural constituent of skin epidermis	3/419	15/18368	0.00437201	0.0457442	0.0380101	5317/6698/6704	3
GO:0120013	MF	GO:0120013	lipid transfer activity	5/419	48/18368	0.00461292	0.0473872	0.0393753	336/4547/335/338/337	5
